# Supplementary material
Source: publisher figshare collection journal article supplement (https://acs.figshare.com/ndownloader/files/4187269)
Supplement: Supplementary file 1 [file 4187269]

**Supporting Information for:**

**Preparation of Calcium Alginate Nanoparticles Using Water-in-Oil (W/O)  
Nanoemulsions**

Alexandra H. E. Machado,<sup>†,‡,\*</sup> Dan Lundberg,<sup>§,†</sup> António J. Ribeiro,<sup>‡</sup> Francisco J. Veiga,<sup>‡</sup>  
Björn Lindman,<sup>§,†</sup> Maria G. Miguel,<sup>§</sup> and Ulf Olsson<sup>†</sup>

<sup>†</sup>Division of Physical Chemistry, Center for Chemistry and Chemical Engineering, Lund University, P.O. Box 124, SE-221 00 Lund, Sweden, and <sup>‡</sup>Center for Pharmaceutical Studies, Faculty of Pharmacy, University of Coimbra, 3000-548 Coimbra, Portugal, and <sup>§</sup>Department of Chemistry, University of Coimbra, 3004-535 Coimbra, Portugal

\*To whom correspondence should be addressed.

Alexandra H. E. Machado

E-mail: alexandra.machado@fkem1.lu.se

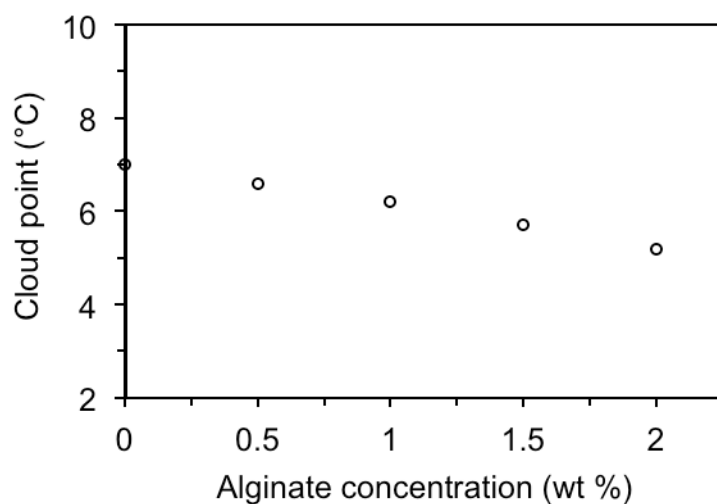

**Figure S1.** Variation in the cloud point of 1 wt %  $C_{12}E_4$  in water with the concentration of alginate.

The experimental error was estimated to be within  $\pm 0.2$  °C.

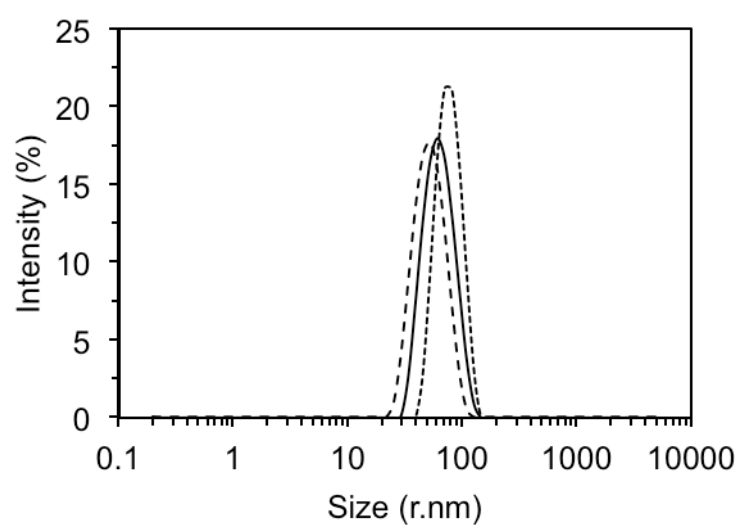

**Figure S2.** Dynamic light scattering size distributions of the nanoemulsions containing 1 wt % (dashed line), 1.5 wt % (solid line) or 2 wt % alginate (dotted line) in the aqueous phase one hour after the addition of  $CaCl_2$ . The samples were prepared with  $\phi_w/\phi_o = 0.07$  and  $\phi_w/\phi_s = 5$ . All the measurements were performed at 40 °C.

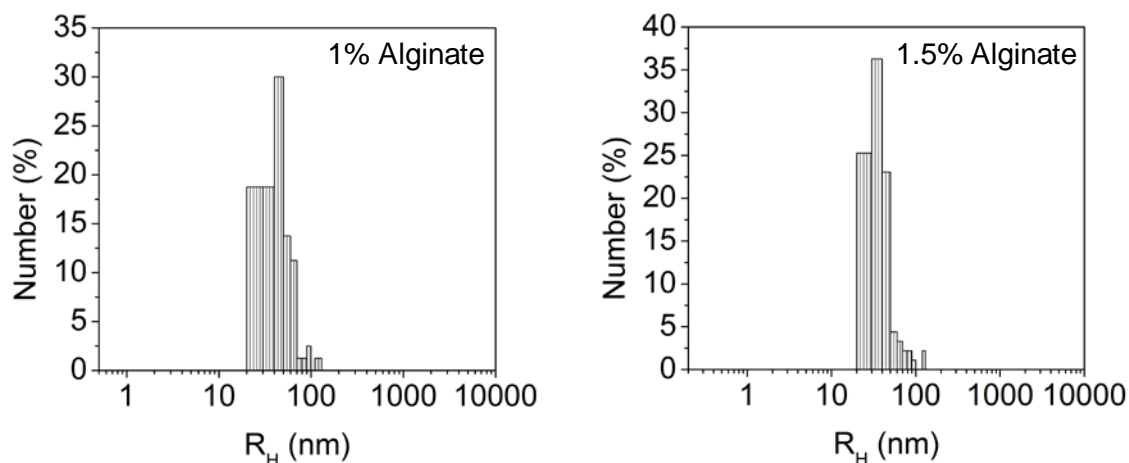

**Figure S3.** Graphics representing the size distribution of the nanoparticles observed in cryo-TEM experiments for samples prepared with different initial concentrations of alginate (wt %). The size of the particles was measured using the public domain image analysis software Image J 1.45l (National Institutes of Health, USA, <http://imagej.nih.gov/ij>). Measurements were performed in at least 80 particles present in the different images recorded for each sample.

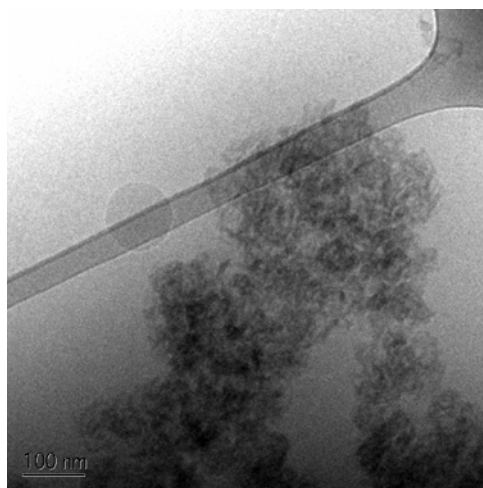

**Figure S4.** Cryo-TEM micrograph showing the coexistence of nanoparticles with irregular structures.

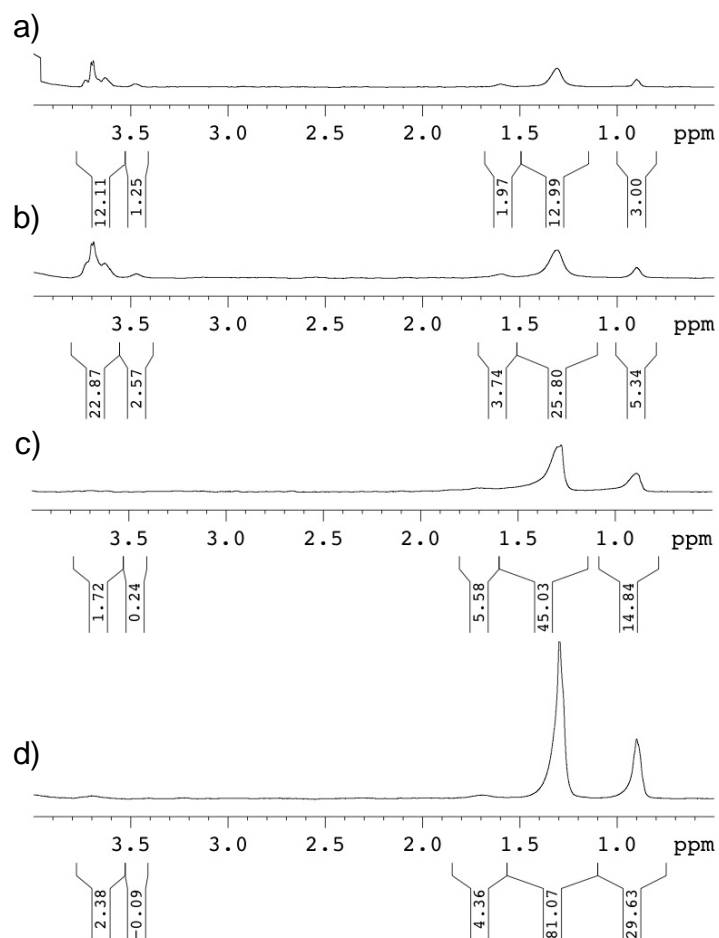

**Figure S5.**  $^1\text{H}$  NMR spectra of the samples initially prepared with 1 wt % (c) and 1.5% (d) alginate after the purification procedure. The spectra of two standards of  $\text{C}_{12}\text{E}_4$ , 0.05 wt % (a) and 0.1 wt % (b), are also shown as reference. The measurements were performed at 5  $^\circ\text{C}$ .
